# Supplementary material
Source: publisher site journal article supplement (https://www.dovepress.com/article/548590)
Supplement: Supplementary file 1 [file Supplementary%20materials.docx]

Supplementary materials


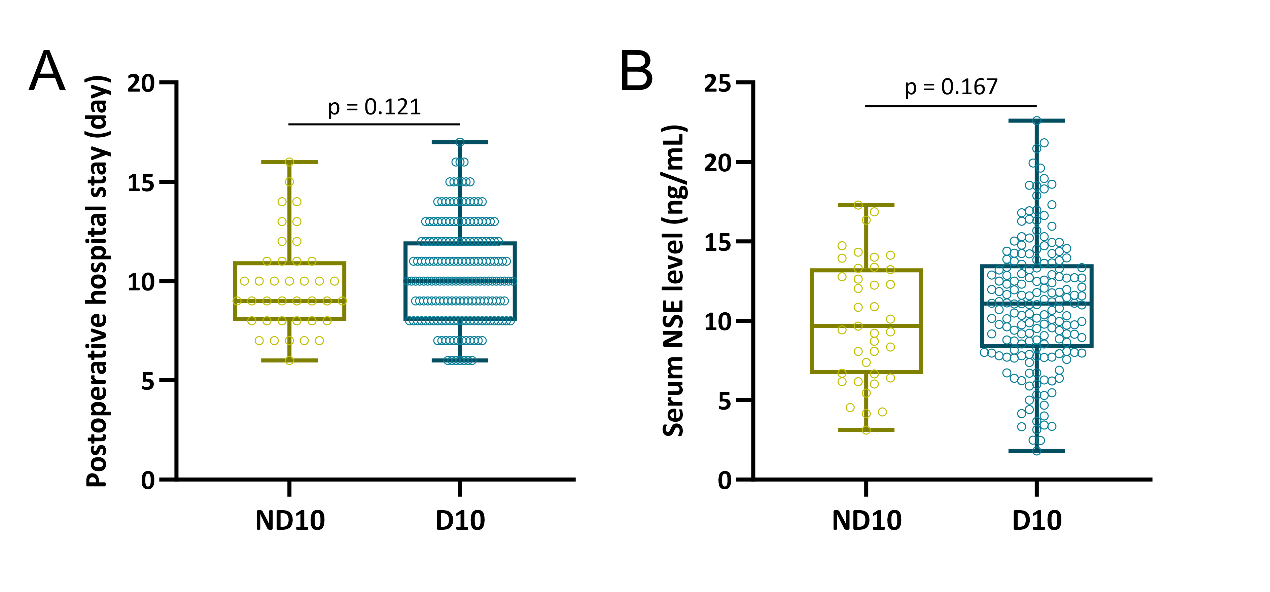


Figure S1. Comparisons of postoperative hospital stay (A) and serum NSE levels at 3 days post-operation (B) between elderly patients underwent laparoscopic partial hepatectomy with 10% decrease of rSO2 intraoperatively (D10) or not (ND10). The data were presented as mean ± SD. The comparisons of data between the two groups were done by Unpaired t test with Welch's correction.

Table S1. Demographic and clinical factors of elderly patients underwent laparoscopic partial hepatectomy with 10% decrease of rSO2 intraoperatively (D10) or not (ND10).

|  | ND10 (n = 39) | D10 (n = 179) | p value |
| --- | --- | --- | --- |
| Age (years) | 67.75 ± 7.14 | 68.03 ± 7.52 | 0.382 |
| Body mass index (kg/m2) | 23.44 ± 3.77 | 23.84 ± 3.91 | 0.637 |
| Gender | | | |
| Male | 23 (59.0%) | 99 (55.3%) | 0.724 |
| Female | 16 (41.0%) | 80 (44.7%) |
| ASA | | | |
| II | 17 (43.6%) | 71 (39.7%) | 0.719 |
| III | 22 (56.4%) | 108 (60.3%) |
| Child-Pugh score | | | |
| A | 16 (41.0%) | 64 (35.8%) | 0.584 |
| B | 23 (59.0%) | 115 (64.2%) |
| Diabetes mellitus | | | |
| Yes | 8 (20.5%) | 42 (23.5%) | 0.834 |
| No | 31 (79.5%) | 137 (76.5%) |
| Hypertension | | | |
| Yes | 14 (35.9%) | 51 (28.5%) | 0.439 |
| No | 25 (64.1%) | 128 (71.5%) |
| Operation time (min) | 216.48 ± 53.72 | 220.74 ± 56.28 | 0.495 |
| Intraoperative blood loss (mL) | 284.23 ± 90.35 | 279.61 ± 93.24 | 0.582 |
| Infusion quantity (mL) | 1864.13 ± 530.22 | 1873.23 ± 568.26 | 0.402 |

The data were presented as mean ± SD or n (percentage). The comparisons of data between the two groups were done by Mann Whitney test or Unpaired t test with Welch's correction or Fisher’s exact test. ASA: American Society of Anesthesiologists.

on or Fisher’s exact test. ASA: American Society of Anesthesiologists.

Table S2. Comparisons of heart rate (HR) and mean arterial pressure (MAP) during the operation between elderly patients underwent laparoscopic partial hepatectomy with 10% decrease of rSO2 intraoperatively (D10) or not (ND10).

|  | HR (bpm) | | | MAP (mmHg) | | |
| --- | --- | --- | --- | --- | --- | --- |
|  | ND10 (n = 39) | D10 (n = 179) | p | ND10 (n = 39) | D10 (n = 179) | p |
| Pre-anesthesia | 76.22 ± 10.51 | 75.94 ± 11.03 | 0.781 | 90.42 ± 10.48 | 90.13 ± 10.36 | 0.854 |
| Beginning of operation | 72.44 ± 10.24 | 71.56 ± 10.94 | 0.352 | 82.16 ± 12.27 | 80.91± 13.62 | 0.219 |
| 10 min after operation start | 68.34 ± 11.13 | 68.02 ± 11.28 | 0.691 | 76.46 ± 11.33 | 75.38 ± 10.72 | 0.258 |
| 10 min after hepatectomy | 67.89 ± 10.85 | 67.24 ± 10.59 | 0.338 | 81.14 ± 10.94 | 79.93 ± 11.22 | 0.169 |
| End of operation | 71.17 ± 11.23 | 70.88 ± 11.39 | 0.312 | 86.75 ± 11.18 | 85.83 ± 11.24 | 0.227 |

The data were presented as mean ± SD. The comparisons of data between the two groups were done by Mann Whitney test or Unpaired t test with Welch's correction.

Table S3. Comparisons of perioperative complications between elderly patients underwent laparoscopic partial hepatectomy with 10% decrease of rSO2 intraoperatively (D10) or not (ND10).

|  | ND10 (n = 39) | D10 (n = 179) | p value |
| --- | --- | --- | --- |
| Postoperative hypothermia | | | |
| Yes | 10 (25.6%) | 62 (34.6%) | 0.349 |
| No | 29 (74.4%) | 117 (65.4%) |
| Nausea and vomiting | | | |
| Yes | 16 (41.0%) | 78 (43.6%) | 0.859 |
| No | 23 (59.0%) | 101 (56.4%) |
| Shivering | | | |
| Yes | 14 (35.9%) | 72 (40.2%) | 0.719 |
| No | 25 (64.1%) | 107 (59.8%) |
| Delirium at 3 days post-operation | | | |
| Yes | 5 (12.8%) | 40 (22.3%) | 0.274 |
| No | 34 (87.2%) | 139 (77.7%) |

The data were presented as n (percentage). The comparisons of data between the two groups were done by Fisher’s exact test.
